# Supplementary material for: Wilson’s disease presenting as central pontine myelinolysis
Source: Springer Nature journal article supplement (doi:10.1007/s10072-017-3064-9), 2017-08-07
Supplement: MOESM1 [file 17673416]

**Supplementary table 1**: clinical and imaging features of reported cases of WD and CPM

| Author | Number of patients | Sex | Age at disease onset | Age at report | First presentation | Other neurologic symptoms and signs | Brain MRI findings |
| --- | --- | --- | --- | --- | --- | --- | --- |
| Rajesh (2012) | 1 | F | 6 months | 7 y | Dysphagia, drooling and dysarthria | Generalized dystonia including face, vacuous smile, walking difficulty | T2 hyperintensity in putamens, caudates, thalami and central pons |
| Sinha (2010) | 20 | M:9  F:11 | 14.2±4.6 y | 15.2±4.4 y | Not mentioned | Dysarthria, dysphagia, drooling, dystonia, Parkinsonism, gait abnormality, ataxia, pseudobulbar palsy, behavioral change | T2 hyperintensity in putamens, caudates, globus pallidi, thalami, midbrain, cerebellum, cerebral white matter and central pons |
| Kizkin (2003) | 1 | M | 32 y | 35 y | Hand tremor, head shake and dysarthria | Postural instability, recurrent falls, ataxia, brisk deep tendon reflexes and ataxia | T2 hyperintensity in dorsal and central pons |
| Imiya (1992) | 3 | F | 35 y | 36 y | Dysarthria, gait difficulty and problem with handwriting | Tremor, parkinsonism, ataxia and spasticity | High T2 signal in putamens, thalami, internal capsule, pulvinar and base of pons |
|  | F | 18 y | 22 y | Slow speech | Tremor, dysarthria, ataxia and spasticity | High T2 signal in putamens, thalami, internal and external capsule, pulvinar, dentate and base of pons |
|  | M | 12 y | 32 y | Gait difficulty | Tremor, parkinsonism, dysarthria, spasticity, ataxia and abnormal gait | High T2 signal in putamens, thalami, internal and external capsule and base of pons |

WD: Wilson’s disease, CPM: central pontine myelinolysis, Y: year, M: male, F: female
